# Supplementary material
Source: publisher site journal article supplement (https://www.dovepress.com/get_supplementary_file.php?f=260986.docx)
Supplement: Supplementary file 1 [file get_supplementary_file.php]

**Supplementary material**
